# Supplementary material for: “Obesity and Insulin Resistance” Is the Component of the Metabolic Syndrome Most Strongly Associated with Oxidative Stress
Source: MDPI journal article supplement (doi:10.3390/antiox11010079), 2021-12-29

Figure S1. Main contributions of the variables to the principal components. (A) Component 1 (“Obesity and insulin resistance”) vs. Component 2 (“Dyslipidemia”); (B) Component 2 (“Dyslipidemia”) vs. Component 3 (“Blood pressure”); (C) Component 1 (“Obesity and insulin resistance”) vs. Component 3 (“Blood pressure”). Patients with MS are presented as blue triangles whilst patients without MS are presented as yellow circles.

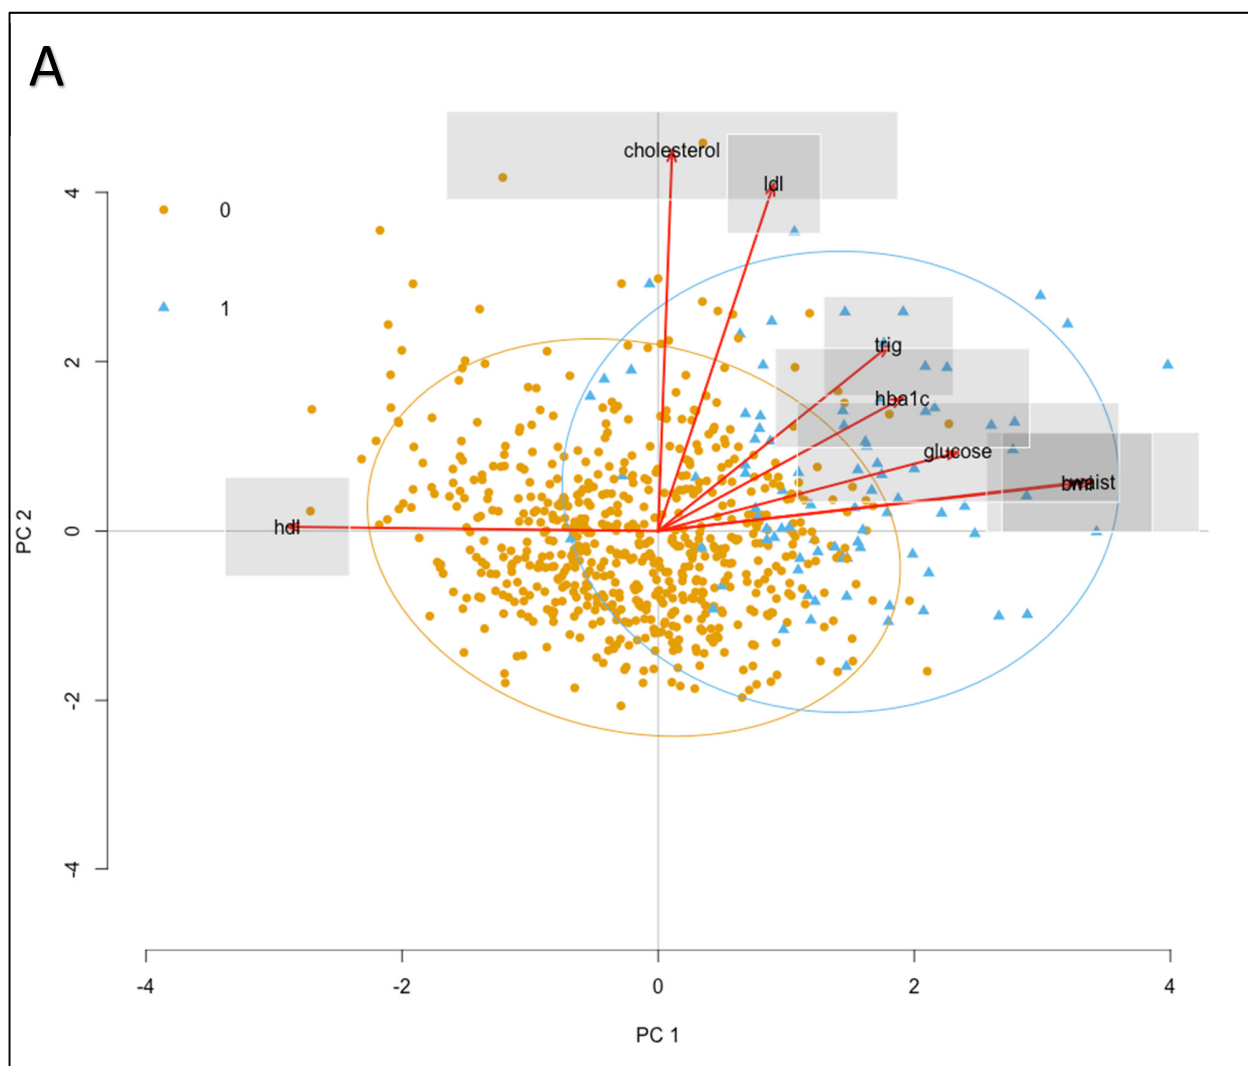

**B**

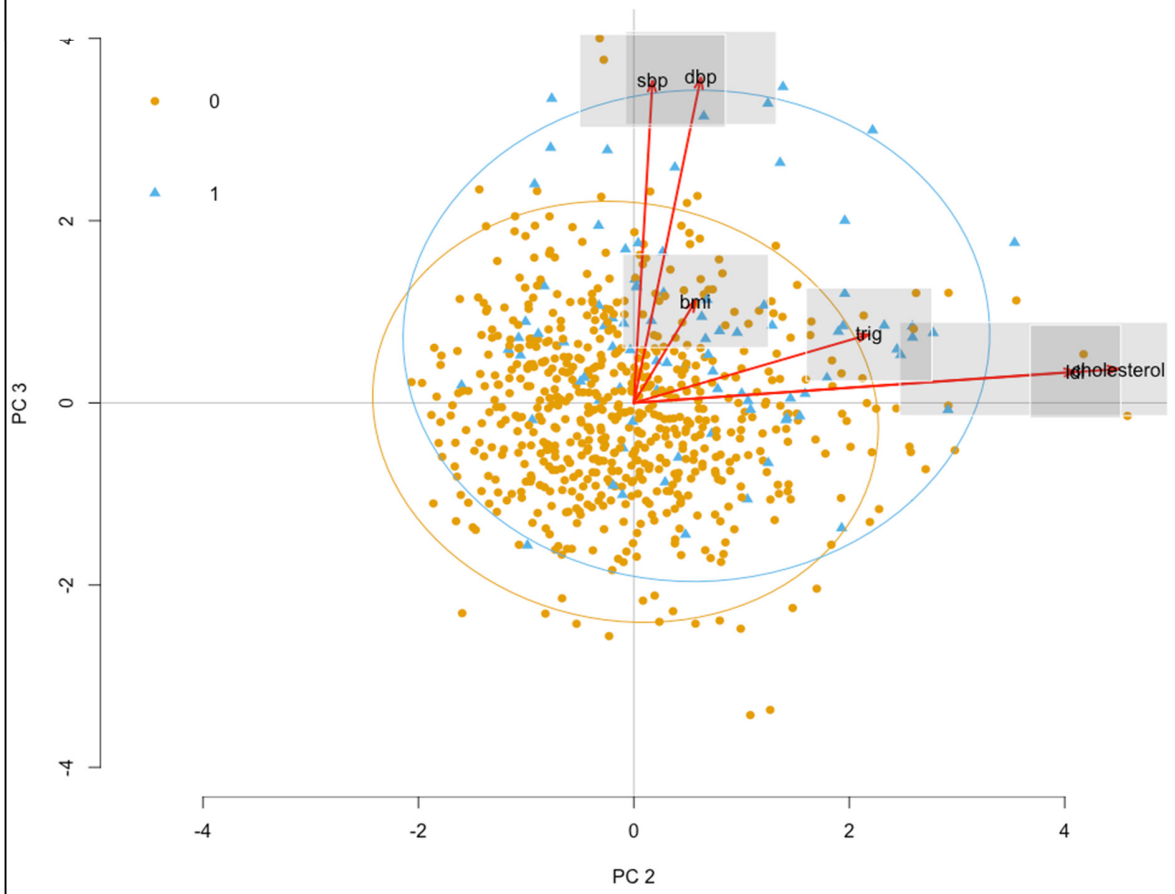

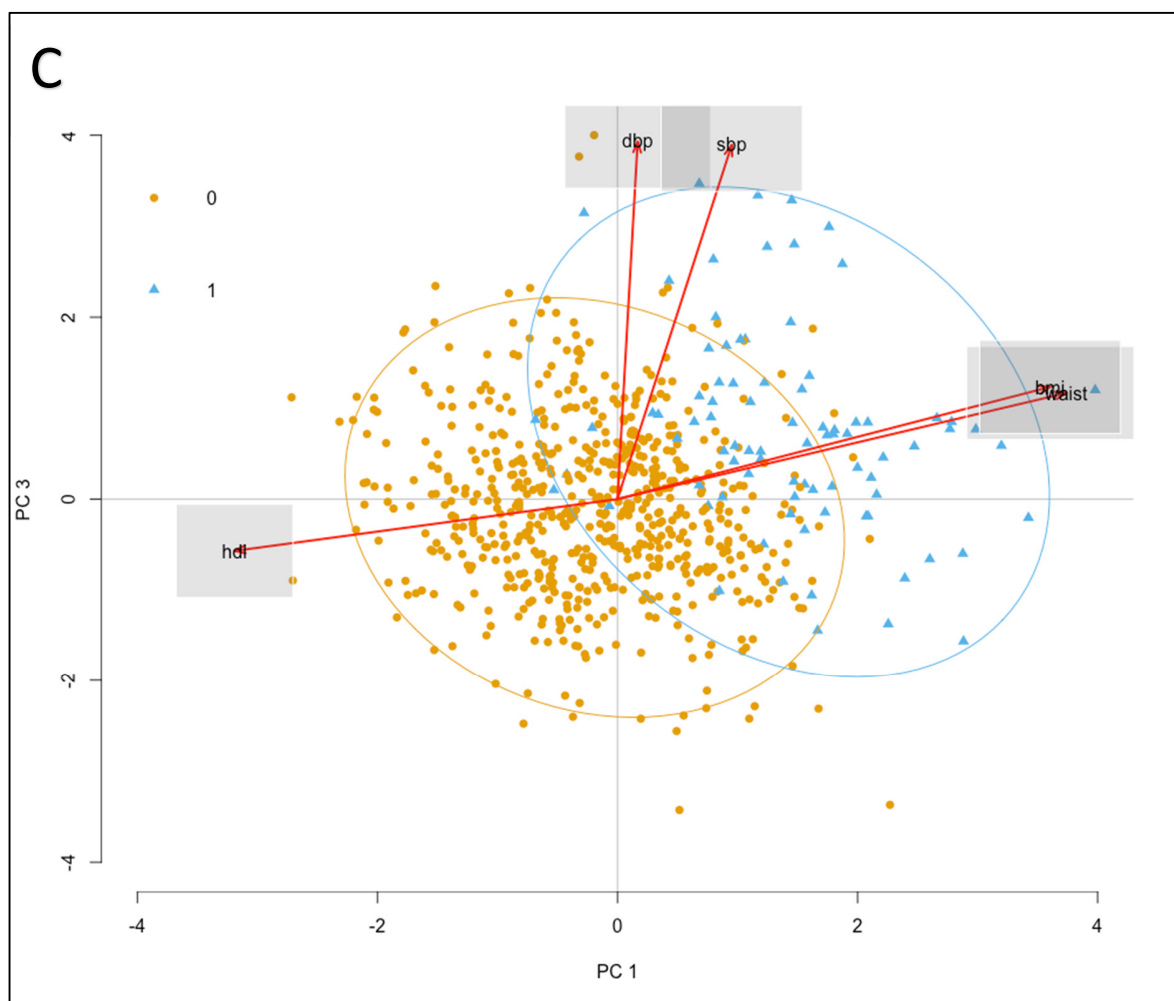

Supplement: s1 [file s1]
